# Supplementary material for: Facile Fabrication of Thin-Bottom Round-Well Plates Using the Deformation of PDMS Molds and Their Application for Single-Cell PCR
Source: MDPI journal article supplement (doi:10.3390/mi11080748), 2020-07-31
Supplement: s1 [file s1]

## Supplementary Materials

### Facile Fabrication of Thin-Bottom Round-Well Plates Using the Deformation of PDMS Molds and Their Application for Single-Cell PCR

Shinya Yamahira and Yuji Heike

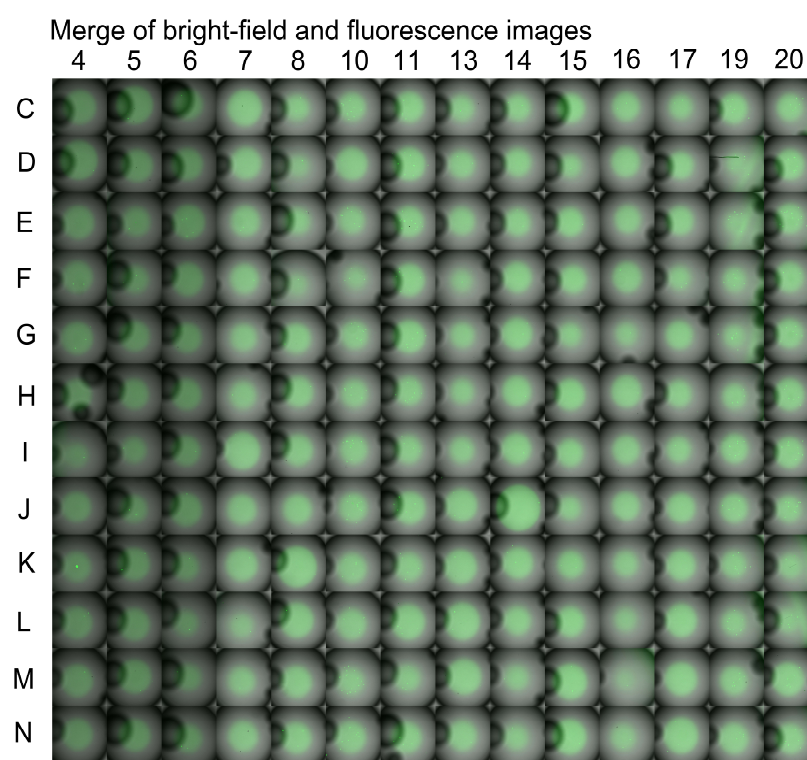

**Figure 1.** Observation of cells in the PCR mixture on the well bottom (all wells).
